# Supplementary material
Source: PubMed Central journal article supplement (PMC4121555)
Supplement: supp_dyu047_ije-2013-08-0841-File003.pdf [file supp_dyu047_ije-2013-08-0841-File003.pdf]

## **SUPPLEMENTAL TABLES AND FIGURES FOR KRIEGER ET AL: Tables S1-S3, Figures S1-S2**

**Table S1. Cut-points for income data (in 2010 CPI-UR-S adjusted dollars) for mid-point of each survey: US National Health Examination Survey (NHES) I (1959-1962) through US National Health and Nutrition Examination Survey (NHANES) 2005-2008.**

**Table S2. Health outcomes among US-born black non-Hispanic and white non-Hispanic adults age 25-74, overall and by family income percentile, risk of poverty, and education, for body mass index (BMI), waist circumference, systolic blood pressure, and serum cholesterol: US National Health Examination Survey (NHES) I (1959-1962) through US National Health and Nutrition Examination Survey (NHANES) 2005-2008.**

**Table S3. Height (boys and girls, age 6-8) and age at menarche (girls only) among US-born black non-Hispanic and white non-Hispanic children age 6-17, by family income percentile and risk of poverty: US National Health Examination Survey (NHES) II (1963-1965) through US National Health and Nutrition Examination Survey (NHANES) 2005-2008.**

**Figure S1. Risk of poverty and body build, cardiovascular, and child development outcomes for black and white non-Hispanic participants (adults 25-74; children 6-17), National Health and Examination Survey I (1959-1962) through National Health and Nutrition Examination Survey 2005-2008: on-average values for, and mean difference between, persons in households at risk of poverty and at twice the risk of poverty adjusted for age and gender).**

**Figure S2. Black vs white difference for body build, cardiovascular, and child development outcomes for black and white non-Hispanic participants (adults 25-74; children 6-17), National Health and Examination Survey I (1959-1962) through National Health and Nutrition Examination Survey 2005-2008: overall (adjusted for age and gender) and additionally adjusted for risk of poverty.**

**Table S1. Cut-points for income data (in 2010 CPI-UR-S adjusted dollars) for mid-point of each survey: US National Health Examination Survey (NHES) I (1959-1962) through US National Health and Nutrition Examination Survey (NHANES) 2005-2008.**

|                                                                                                          | NHES I      | NHES II     | NHES III    | NHANES I    | NHANES II   | NHANES III  |             | NHANES      |           |           | NHANES    |           |           |
|----------------------------------------------------------------------------------------------------------|-------------|-------------|-------------|-------------|-------------|-------------|-------------|-------------|-----------|-----------|-----------|-----------|-----------|
|                                                                                                          | (1959-1962) | (1963-1965) | (1966-1970) | (1971-1975) | (1976-1980) | (1988-1994) | Phase I     | Phase II    | NHANES    | NHANES    | NHANES    | NHANES    | NHANES    |
|                                                                                                          |             |             |             |             |             |             | (1989-1991) | (1991-1994) | 1999-2000 | 2001-2002 | 2003-2004 | 2005-2006 | 2007-2008 |
| <b>Survey mid-point</b>                                                                                  | 1961        | 1964.5      | 1968        | 1972.5      | 1978        |             | 1990        | 1993        | 2000      | 2002      | 2004      | 2006      | 2008      |
| <b>US family income level (in 2010 CPI-UR-S adjusted dollars): percentile cut-points</b>                 |             |             |             |             |             |             |             |             |           |           |           |           |           |
| <b>20<sup>th</sup> percentile</b>                                                                        | \$ 28152    | \$ 29198    | \$ 28594    | \$ 29087    | \$ 30387    | \$ 25215    | \$ 27243    | \$ 27014    | \$ 26415  | \$ 24957  | \$ 20580  | \$ 17860  |           |
| <b>50<sup>th</sup> percentile</b>                                                                        | \$ 62299    | \$ 63161    | \$ 62402    | \$ 62634    | \$ 64232    | \$ 54915    | \$ 57172    | \$ 54103    | \$ 52335  | \$ 47409  | \$ 41241  | \$ 36581  |           |
| <b>80<sup>th</sup> percentile</b>                                                                        | \$ 114637   | \$ 118034   | \$ 115429   | 114493      | \$ 115690   | \$ 99246    | \$ 99440    | \$ 88331    | \$ 83613  | \$ 73597  | \$ 64033  | \$ 57630  |           |
| <b>at risk of poverty<sup>a</sup></b>                                                                    | \$ 37380    | \$ 37896    | \$ 37441    | \$ 37580    | \$ 38539    | \$ 32949    | \$ 34303    | \$ 32462    | \$ 31401  | \$ 28446  | \$ 24745  | \$ 21948  |           |
| <b>above 2x the risk of poverty</b>                                                                      | \$ 74759    | \$ 75793    | \$ 74882    | \$ 75161    | \$ 77079    | \$ 65898    | \$ 68606    | \$ 64923    | \$ 62802  | \$ 56891  | \$ 49489  | \$ 43897  |           |
| <b>Comparison to US poverty data:</b>                                                                    |             |             |             |             |             |             |             |             |           |           |           |           |           |
| <b>US poverty line<sup>b</sup></b>                                                                       | \$ 18,969   | \$ 19,081   | \$ 19,102   | \$ 19,458   | \$ 20,436   | \$ 21,616   | \$ 21,936   | \$ 22,283   | \$ 22,293 | \$ 22,294 | \$ 22,285 | \$ 22,292 |           |
| <b>Ratio of “at risk of poverty” line (&lt;60% median family income) to US poverty line for families</b> | 1.97        | 1.99        | 1.96        | 1.93        | 1.89        | 1.52        | 1.56        | 1.46        | 1.41      | 1.28      | 1.11      | 0.98      |           |
| <b>US poverty rate for families<sup>c</sup> (%)</b>                                                      | 18.1        | 14.4        | 10.0        | 9.0         | 9.1         | 10.7        | 12.3        | 8.7         | 9.6       | 10.2      | 9.8       | 10.3      |           |

**Note:**

<sup>a</sup> “at risk of poverty” defined as <60% of median family income (per European Union criteria<sup>22,27</sup>)

<sup>b</sup> US poverty line: weighted average threshold for a family of 4, in 2010 CPI-UR-S adjusted dollars<sup>25</sup>

<sup>c</sup> US poverty rate for families<sup>25</sup>

**Table S2. Health outcomes among US-born black non-Hispanic and white non-Hispanic adults age 25-74, overall and by family income percentile, risk of poverty, and education, for body mass index (BMI), waist circumference, systolic blood pressure, and serum cholesterol: US National Health Examination Survey (NHES) I (1959-1962) through US National Health and Nutrition Examination Survey (NHANES) 2005-2008.**

| Health outcome                                          | Race/<br>ethnicity              | Income and education         | NHES I (1959-<br>1962) | NHANES I<br>(1971-1975) | NHANES II<br>(1976-1980) | NHANES III<br>(1988-1994) | NHANES<br>(1999-2004) | NHANES<br>(2005-2008) |
|---------------------------------------------------------|---------------------------------|------------------------------|------------------------|-------------------------|--------------------------|---------------------------|-----------------------|-----------------------|
|                                                         |                                 |                              | mean (SD)              | mean (SD)               | mean (SD)                | mean (SD)                 | mean (SD)             | mean (SD)             |
| <b>Body mass<br/>index (BMI)<br/>(kg/m<sup>2</sup>)</b> | US-born black<br>(non-Hispanic) | <i>Income level</i>          |                        |                         |                          |                           |                       |                       |
|                                                         |                                 | 20 <sup>th</sup> percentile  | 26.67 (0.46)           | 27.43 (0.37)            | 27.63 (0.54)             | 28.15 (0.30)              | 30.71 (0.30)          | 31.28 (0.50)          |
|                                                         |                                 | 50 <sup>th</sup> percentile  | 26.53 (0.29)           | 27.26 (0.30)            | 27.31 (0.36)             | 28.10 (0.21)              | 30.62 (0.23)          | 31.22 (0.30)          |
|                                                         |                                 | 80 <sup>th</sup> percentile  | 27.34 (0.74)           | 26.53 (1.17)            | 27.19 (0.71)             | 28.31 (0.36)              | 30.01 (0.51)          | 30.83 (0.36)          |
|                                                         |                                 | <i>Poverty level</i>         |                        |                         |                          |                           |                       |                       |
|                                                         |                                 | at risk of poverty           | 26.58 (0.36)           | 27.40 (0.37)            | 27.46 (0.39)             | 28.05 (0.23)              | 30.62 (0.25)          | 31.09 (0.39)          |
|                                                         |                                 | above 2x the risk of poverty | 27.37 (0.51)           | 27.12 (1.37)            | 26.83 (0.75)             | 28.36 (0.29)              | 30.30 (0.47)          | 30.75 (0.31)          |
|                                                         |                                 | <i>Education</i>             |                        |                         |                          |                           |                       |                       |
|                                                         |                                 | < HS                         | 26.85 (0.27)           | 27.42 (0.29)            | 27.85 (0.33)             | 28.36 (0.21)              | 30.51 (0.37)          | 30.38 (0.32)          |
|                                                         | >=HS, < 4y college              | 26.73 (0.99)                 | 26.84 (0.51)           | 26.22 (0.26)            | 28.25 (0.24)             | 30.73 (0.28)              | 31.38 (0.31)          |                       |
|                                                         | >=4 y college                   | 26.50 (0.80)                 | 24.37 (0.77)           | 26.44 (0.49)            | 27.87 (0.36)             | 29.59 (0.47)              | 30.45 (0.43)          |                       |
|                                                         | US-born white<br>(non-Hispanic) | <i>Income level</i>          |                        |                         |                          |                           |                       |                       |
|                                                         |                                 | 20 <sup>th</sup> percentile  | 25.80 (0.24)           | 25.80 (0.18)            | 26.10 (0.20)             | 27.42 (0.29)              | 28.84 (0.22)          | 29.17 (0.31)          |
|                                                         |                                 | 50 <sup>th</sup> percentile  | 25.87 (0.16)           | 25.62 (0.13)            | 25.61 (0.10)             | 26.97 (0.20)              | 28.60 (0.16)          | 29.07 (0.23)          |
|                                                         |                                 | 80 <sup>th</sup> percentile  | 25.16 (0.13)           | 25.23 (0.23)            | 25.14 (0.16)             | 26.27 (0.23)              | 27.69 (0.25)          | 28.31 (0.27)          |
| <i>Poverty level</i>                                    |                                 |                              |                        |                         |                          |                           |                       |                       |
| at risk of poverty                                      |                                 | 25.99 (0.20)                 | 25.73 (0.16)           | 25.57 (0.15)            | 27.26 (0.24)             | 28.69 (0.18)              | 29.05 (0.28)          |                       |
| above 2x the risk of poverty                            |                                 | 25.13 (0.12)                 | 25.29 (0.16)           | 25.28 (0.13)            | 26.33 (0.20)             | 27.77 (0.22)              | 28.43 (0.25)          |                       |
| <i>Education</i>                                        |                                 |                              |                        |                         |                          |                           |                       |                       |
| < HS                                                    |                                 | 25.60 (0.13)                 | 26.01 (0.10)           | 26.37 (0.12)            | 27.35 (0.21)             | 28.75 (0.32)              | 29.21 (0.31)          |                       |
| >=HS, < 4y college                                      | 24.47 (0.17)                    | 25.22 (0.11)                 | 25.39 (0.11)           | 26.98 (0.20)            | 28.59 (0.16)             | 29.33 (0.17)              |                       |                       |
| >=4 y college                                           | 24.85 (0.18)                    | 24.73 (0.18)                 | 24.48 (0.15)           | 25.61 (0.21)            | 27.40 (0.23)             | 27.57 (0.28)              |                       |                       |
| <b>Waist<br/>circumference<br/>(WC) (cm)</b>            | US-born black<br>(non-Hispanic) | <i>Income level</i>          |                        |                         |                          |                           |                       |                       |
|                                                         |                                 | 20 <sup>th</sup> percentile  | 84.19 (0.85)           |                         |                          | 94.01 (0.72)              | 99.21 (0.55)          | 101.24 (1.05)         |
|                                                         |                                 | 50 <sup>th</sup> percentile  | 84.41 (0.66)           |                         |                          | 93.64 (0.47)              | 99.42 (0.52)          | 101.16 (0.71)         |
|                                                         |                                 | 80 <sup>th</sup> percentile  | 83.78 (2.55)           |                         |                          | 94.03 (0.85)              | 98.69 (1.11)          | 99.38 (0.75)          |
|                                                         |                                 | <i>Poverty level</i>         |                        |                         |                          |                           |                       |                       |
|                                                         |                                 | at risk of poverty           | 84.26 (0.82)           |                         |                          | 93.84 (0.55)              | 99.41 (0.49)          | 100.88 (0.87)         |
|                                                         |                                 | above 2x the risk of poverty | 85.49 (1.86)           |                         |                          | 94.24 (0.69)              | 98.84 (1.06)          | 99.52 (0.72)          |

|                                        |                              |                             |               |               |               |               |               |               |
|----------------------------------------|------------------------------|-----------------------------|---------------|---------------|---------------|---------------|---------------|---------------|
| <b>Systolic blood pressure (mm Hg)</b> | US-born white (non-Hispanic) | <i>Education</i>            |               |               |               |               |               |               |
|                                        |                              | < HS                        | 85.22 (0.66)  |               |               | 95.82 (0.52)  | 99.72 (0.69)  | 100.06 (0.77) |
|                                        |                              | >=HS, < 4y college          | 81.21 (1.77)  |               |               | 93.27 (0.54)  | 99.27 (0.59)  | 101.27 (0.67) |
|                                        |                              | >=4 y college               | 79.41 (1.93)  |               |               | 92.42 (0.96)  | 97.05 (1.20)  | 98.34 (0.93)  |
|                                        |                              | <i>Income level</i>         |               |               |               |               |               |               |
|                                        |                              | 20 <sup>th</sup> percentile | 85.67 (0.61)  |               |               | 95.52 (0.81)  | 99.57 (0.57)  | 100.13 (0.72) |
|                                        |                              | 50 <sup>th</sup> percentile | 84.65 (0.46)  |               |               | 93.83 (0.48)  | 98.61 (0.41)  | 99.92 (0.50)  |
|                                        |                              | 80 <sup>th</sup> percentile | 82.75 (0.37)  |               |               | 91.53 (0.55)  | 95.83 (0.65)  | 98.06 (0.70)  |
|                                        |                              | <i>Poverty level</i>        |               |               |               |               |               |               |
|                                        | at risk of poverty           | 85.71 (0.60)                |               |               | 94.91 (0.64)  | 99.01 (0.50)  | 99.98 (0.55)  |               |
|                                        | above 2x the risk of poverty | 82.68 (0.29)                |               |               | 91.71 (0.47)  | 95.96 (0.54)  | 98.3 (0.61)   |               |
|                                        | US-born black (non-Hispanic) | <i>Education</i>            |               |               |               |               |               |               |
|                                        |                              | < HS                        | 83.58 (0.37)  |               |               | 95.72 (0.66)  | 99.83 (0.77)  | 101.39 (0.66) |
|                                        |                              | >=HS, < 4y college          | 81.23 (0.65)  |               |               | 93.10 (0.46)  | 98.11 (0.37)  | 100.42 (0.43) |
|                                        |                              | >=4 y college               | 82.66 (0.63)  |               |               | 90.48 (0.53)  | 95.47 (0.59)  | 96.05 (0.65)  |
|                                        |                              | <i>Income level</i>         |               |               |               |               |               |               |
|                                        |                              | 20 <sup>th</sup> percentile | 145.44 (2.91) | 143.34 (1.63) | 133.03 (1.27) | 126.99 (0.69) | 128.43 (0.7)  | 128.48 (1.13) |
|                                        |                              | 50 <sup>th</sup> percentile | 140.79 (1.99) | 141.01 (1.25) | 131.83 (0.68) | 125.72 (0.57) | 127.66 (0.58) | 127.24 (0.75) |
|                                        |                              | 80 <sup>th</sup> percentile | 130.13 (3.15) | 130.09 (2.68) | 130.55 (2.61) | 124.66 (1.27) | 125.92 (1.29) | 123.47 (1.33) |
|                                        |                              | <i>Poverty level</i>        |               |               |               |               |               |               |
|                                        | at risk of poverty           | 143.01 (2.74)               | 142.68 (1.59) | 132.54 (0.82) | 126.77 (0.68) | 128.4 (0.55)  | 127.9 (0.83)  |               |
| above 2x the risk of poverty           | 131.89 (2.40)                | 132.64 (3.72)               | 128.09 (1.78) | 124.36 (1.00) | 126.13 (1.02) | 123.34 (1.19) |               |               |
| US-born white (non-Hispanic)           | <i>Education</i>             |                             |               |               |               |               |               |               |
|                                        | < HS                         | 139.17 (1.92)               | 142.8 (1.54)  | 135.29 (0.98) | 130.91 (0.73) | 130.21 (0.85) | 130.26 (1.37) |               |
|                                        | >=HS, < 4y college           | 127.76 (4.87)               | 131.99 (1.38) | 125.25 (1.21) | 123.17 (0.53) | 126.57 (0.79) | 125.52 (0.85) |               |
|                                        | >=4 y college                | 135.56 (4.80)               | 137.06 (8.07) | 122.52 (2.55) | 122.07 (1.06) | 124.45 (1.03) | 121.61 (0.93) |               |
|                                        | <i>Income level</i>          |                             |               |               |               |               |               |               |
|                                        | 20 <sup>th</sup> percentile  | 143.90 (1.52)               | 140.19 (0.89) | 132.99 (1.08) | 124.50 (1.03) | 123.70 (0.55) | 125.18 (0.75) |               |
|                                        | 50 <sup>th</sup> percentile  | 135.80 (1.05)               | 135.50 (0.63) | 129.30 (0.71) | 123.00 (0.69) | 123.13 (0.48) | 123.32 (0.43) |               |
|                                        | 80 <sup>th</sup> percentile  | 128.94 (0.75)               | 128.43 (0.98) | 125.07 (0.97) | 119.68 (0.63) | 119.48 (0.67) | 120.10 (0.55) |               |
|                                        | <i>Poverty level</i>         |                             |               |               |               |               |               |               |
| at risk of poverty                     | 140.84 (1.28)                | 139.26 (0.82)               | 130.60 (0.87) | 123.96 (0.98) | 123.27 (0.58) | 124.53 (0.53) |               |               |
| above 2x the risk of poverty           | 129.16 (0.73)                | 128.59 (0.8)                | 125.13 (0.81) | 119.75 (0.57) | 119.99 (0.55) | 120.04 (0.56) |               |               |
|                                        | <i>Education</i>             |                             |               |               |               |               |               |               |

|                                  |                              |                             |               |                |               |               |               |               |
|----------------------------------|------------------------------|-----------------------------|---------------|----------------|---------------|---------------|---------------|---------------|
| <b>Serum cholesterol (mg/dL)</b> | US-born black (non-Hispanic) | < HS                        | 132.55 (0.81) | 138.11 (0.72)  | 132.67 (0.82) | 125.86 (0.84) | 126.08 (0.86) | 125.34 (0.82) |
|                                  |                              | >=HS, < 4y college          | 129.3 (1.55)  | 129.46 (0.51)  | 126.03 (0.67) | 121.40 (0.46) | 122.25 (0.37) | 122.72 (0.48) |
|                                  |                              | >=4 y college               | 126.85 (1.23) | 127.56 (1.01)  | 123.3 (0.77)  | 118.71 (0.79) | 119.70 (0.66) | 118.92 (0.41) |
|                                  |                              | <i>Income level</i>         |               |                |               |               |               |               |
|                                  |                              | 20 <sup>th</sup> percentile | 221.19 (4.33) | 222.29 (3.18)  | 218.11 (3.04) | 203.10 (2.05) | 198.13 (1.47) | 194.29 (1.83) |
|                                  |                              | 50 <sup>th</sup> percentile | 219.21 (2.81) | 220.87 (2.28)  | 217.15 (2.27) | 202.95 (1.17) | 199.13 (1.26) | 193.20 (1.61) |
|                                  |                              | 80 <sup>th</sup> percentile | 216.66 (6.75) | 219.72 (13.19) | 219.55 (12.7) | 201.08 (3.02) | 199.11 (2.49) | 194.76 (2.81) |
|                                  |                              | <i>Poverty level</i>        |               |                |               |               |               |               |
|                                  |                              | at risk of poverty          | 218.87 (3.34) | 223.37 (3.25)  | 218.22 (2.53) | 202.97 (1.61) | 198.64 (1.33) | 193.32 (1.52) |
|                                  | above 2x the risk of poverty | 219.52 (3.39)               | 218.35 (8.34) | 220.78 (7.05)  | 202.49 (2.38) | 200.28 (2.08) | 196.04 (2.36) |               |
|                                  | <i>Education</i>             |                             |               |                |               |               |               |               |
|                                  | < HS                         | 218.62 (2.31)               | 223.58 (2.44) | 225.31 (2.01)  | 209.05 (1.76) | 200.36 (2.20) | 195.41 (2.50) |               |
|                                  | >=HS, < 4y college           | 216.83 (7.24)               | 214.24 (3.70) | 205.66 (4.23)  | 201.19 (1.03) | 198.16 (1.57) | 193.9 (1.67)  |               |
|                                  | >=4 y college                | 211.23 (7.54)               | 210.39 (7.42) | 217.13 (12.35) | 199.64 (2.68) | 201.97 (2.98) | 191.79 (2.76) |               |
|                                  | US-born white (non-Hispanic) | <i>Income level</i>         |               |                |               |               |               |               |
|                                  | 20 <sup>th</sup> percentile  | 236.11 (2.78)               | 227.96 (1.55) | 222.64 (2.56)  | 210.46 (2.05) | 209.74 (1.58) | 203.45 (2.07) |               |
|                                  | 50 <sup>th</sup> percentile  | 230.61 (1.88)               | 223.33 (1.40) | 220.29 (1.40)  | 207.68 (1.10) | 207.18 (1.22) | 201.85 (1.06) |               |
|                                  | 80 <sup>th</sup> percentile  | 227.33 (1.96)               | 224.89 (2.17) | 218.05 (1.82)  | 205.45 (1.49) | 204.53 (1.34) | 201.26 (1.48) |               |
|                                  | <i>Poverty level</i>         |                             |               |                |               |               |               |               |
| at risk of poverty               | 236.36 (2.68)                | 227.27 (1.60)               | 221.47 (1.76) | 208.50 (1.81)  | 207.58 (1.43) | 202.85 (1.64) |               |               |
| above 2x the risk of poverty     | 225.41 (1.71)                | 219.94 (1.56)               | 218.20 (1.34) | 205.60 (1.36)  | 205.04 (1.15) | 201.41 (1.07) |               |               |
| <i>Education</i>                 |                              |                             |               |                |               |               |               |               |
| < HS                             | 227.81 (1.57)                | 228.78 (1.40)               | 226.77 (1.75) | 214.15 (1.86)  | 209.86 (2.02) | 200.60 (2.25) |               |               |
| >=HS, < 4y college               | 226.78 (3.23)                | 218.37 (1.34)               | 217.60 (1.33) | 207.36 (1.13)  | 207.83 (1.15) | 202.63 (1.10) |               |               |
| >=4 y college                    | 227.83 (3.38)                | 213.14 (2.31)               | 210.72 (1.50) | 202.55 (1.65)  | 202.89 (1.02) | 200.65 (1.36) |               |               |

**Note:** values are based on observed data; the percent missing data typically was low (<5%), with only a few up to 10%, as listed below.

| Health outcome          | Race/ethnicity | NHES I (1959-1962) | NHANES I (1971-1975) | Missing data: N (percent) |                        | NHANES (1999-2004) | NHANES (2005-2008) |
|-------------------------|----------------|--------------------|----------------------|---------------------------|------------------------|--------------------|--------------------|
|                         |                |                    |                      | NHANES II (1976-1980)     | NHANES III (1988-1994) |                    |                    |
| BMI                     | Black          | 0 (0)              | 1 (0.05)             | 0 (0)                     | 7 (0.20)               | 65 (3.22)          | 33 (1.90)          |
|                         | White          | 0 (0)              | 4 (0.05)             | 0 (0)                     | 2 (0.04)               | 113 (2.27)         | 43 (1.20)          |
| Waist                   | Black          | 0 (0)              | NA                   | NA                        | 251 (7.14)             | 109 (5.39)         | 98 (5.64)          |
|                         | White          | 0 (0)              | NA                   | NA                        | 216 (4.63)             | 173 (3.47)         | 150 (4.19)         |
| Systolic blood pressure | White          | 0 (0)              | 20 (0.93)            | 5 (0.47)                  | 44 (1.25)              | 158 (7.82)         | 119 (6.85)         |

|                   |       |            |           |           |            |             |             |
|-------------------|-------|------------|-----------|-----------|------------|-------------|-------------|
|                   | Black | 0 (0)      | 36 (0.43) | 13 (0.18) | 82 (1.76)  | 183 (3.67)  | 126 (3.52)  |
| Serum cholesterol | Black | 23 (3.38)  | 3 (0.14)  | 0 (0)     | 319 (9.08) | 209 (10.34) | 183 (10.53) |
|                   | White | 120 (2.50) | 47 (0.56) | 0 (0)     | 165 (3.54) | 221 (4.43)  | 143 (4.00)  |

**Table S3. Height (boys and girls, age 6-8) and age at menarche (girls only) among US-born black non-Hispanic and white non-Hispanic children age 6-17<sup>a</sup>, by family income percentile and risk of poverty: US National Health Examination Survey (NHES) II (1963-1965) through US National Health and Nutrition Examination Survey (NHANES) 2005-2008.<sup>b</sup>**

| Health outcome               | Age (yr)                    | Race/ ethnicity                   | Socioeconomic measure        | NHES II (1963-1965)<br>mean (SD) | NHES III (1966-1970)<br>mean (SD) | NHANES I (1971-1975)<br>mean (SD) | NHANES II (1976-1980)<br>mean (SD) | NHANES III (1988-1994)<br>mean (SD) | NHANES (1999-2004)<br>mean (SD) | NHANES (2005-2008)<br>mean (SD) |               |
|------------------------------|-----------------------------|-----------------------------------|------------------------------|----------------------------------|-----------------------------------|-----------------------------------|------------------------------------|-------------------------------------|---------------------------------|---------------------------------|---------------|
| Height (cm)                  | 6-8                         | US-born black (non-Hispanic)      | <i>Income percentile</i>     |                                  |                                   |                                   |                                    |                                     |                                 |                                 |               |
|                              |                             |                                   | 20 <sup>th</sup> percentile  | 124.05 (0.41)                    |                                   | 122.97 (0.67)                     | 125.15 (0.72)                      | 126.11 (0.63)                       | 127.06 (0.64)                   | 126.58 (0.64)                   |               |
|                              |                             |                                   | 50 <sup>th</sup> percentile  | 124.17 (0.42)                    |                                   | 123.86 (0.57)                     | 125.42 (0.79)                      | 126.12 (0.45)                       | 127.11 (0.52)                   | 127.03 (0.49)                   |               |
|                              |                             |                                   | 80 <sup>th</sup> percentile  | 129.01 (2.21)                    |                                   | N/A <sup>c</sup>                  | 133.36 (1.10)                      | 128.61 (1.35)                       | 126.85 (1.01)                   | 126.08 (0.75)                   |               |
|                              |                             |                                   | <i>Poverty level</i>         |                                  |                                   |                                   |                                    |                                     |                                 |                                 |               |
|                              |                             |                                   | at risk of poverty           | 124.07 (0.48)                    |                                   | 123.25 (0.61)                     | 124.35 (0.72)                      | 126.05 (0.55)                       | 127.01 (0.58)                   | 126.93 (0.56)                   |               |
|                              |                             |                                   | above 2x the risk of poverty | 126.03 (0.67)                    |                                   | 124.86 (2.78)                     | 126.61 (1.26)                      | 129.04 (0.95)                       | 127.01 (0.93)                   | 127.03 (0.63)                   |               |
|                              |                             |                                   | US-born white (non-Hispanic) | <i>Income percentile</i>         |                                   |                                   |                                    |                                     |                                 |                                 |               |
|                              |                             |                                   |                              | 20 <sup>th</sup> percentile      | 121.75 (0.61)                     |                                   | 123.29 (0.87)                      | 123.27 (1.31)                       | 124.31 (1.10)                   | 124.66 (1.11)                   | 124.56 (0.89) |
|                              |                             | 50 <sup>th</sup> percentile       |                              | 122.42 (0.43)                    |                                   | 123.68 (0.51)                     | 123.63 (0.57)                      | 125.09 (0.68)                       | 125.13 (0.58)                   | 124.94 (0.40)                   |               |
|                              |                             | 80 <sup>th</sup> percentile       |                              | 124.94 (0.26)                    |                                   | 124.23 (0.79)                     | 125.42 (0.56)                      | 125.18 (0.98)                       | 127.01 (0.68)                   | 126.17 (0.60)                   |               |
|                              |                             | <i>Poverty level</i>              |                              |                                  |                                   |                                   |                                    |                                     |                                 |                                 |               |
|                              |                             | at risk of poverty                |                              | 122.27 (0.53)                    |                                   | 123.15 (0.77)                     | 123.5 (0.72)                       | 124.92 (0.94)                       | 124.69 (0.92)                   | 125.01 (0.57)                   |               |
|                              |                             | above 2x the risk of poverty      | 125.11 (0.18)                |                                  | 124.37 (0.77)                     | 125.28 (0.45)                     | 125.24 (0.77)                      | 126.56 (0.57)                       | 126.57 (0.60)                   |                                 |               |
|                              |                             | Age at menarche (yrs): girls only |                              | US-born black (non-Hispanic)     | <i>Income percentile</i>          |                                   |                                    |                                     |                                 |                                 |               |
| 20 <sup>th</sup> percentile  | 10.52 (0.20)                |                                   |                              |                                  | 12.10 (0.10)                      | 12.40 (0.12)                      | 12.20 (0.15)                       | 11.76 (0.08)                        | 11.98 (0.08)                    | 11.76 (0.10)                    |               |
| 50 <sup>th</sup> percentile  | 10.45 (0.09)                |                                   |                              |                                  | 12.19 (0.09)                      | 12.38 (0.11)                      | 12.20 (0.15)                       | 11.69 (0.08)                        | 11.88 (0.06)                    | 11.61 (0.05)                    |               |
| 80 <sup>th</sup> percentile  | N/A <sup>c</sup>            |                                   |                              |                                  | 12.08 (0.27)                      | 10.86 (0.68)                      | 11.55 (0.13)                       | 11.27 (0.27)                        | 11.69 (0.13)                    | 11.56 (0.16)                    |               |
| <i>Poverty level</i>         |                             |                                   |                              |                                  |                                   |                                   |                                    |                                     |                                 |                                 |               |
| at risk of poverty           | 10.46 (0.14)                |                                   |                              |                                  | 12.11 (0.09)                      | 12.38 (0.11)                      | 12.22 (0.17)                       | 11.74 (0.08)                        | 11.93 (0.07)                    | 11.64 (0.08)                    |               |
| above 2x the risk of poverty | 10.00 (0.00)                |                                   |                              | 12.08 (0.27)                     | 10.92 (0.39)                      | 12.04 (0.17)                      | 11.39 (0.21)                       | 11.62 (0.14)                        | 11.52 (0.13)                    |                                 |               |
| US-born white (non-Hispanic) | <i>Income percentile</i>    |                                   |                              |                                  |                                   |                                   |                                    |                                     |                                 |                                 |               |
|                              | 20 <sup>th</sup> percentile |                                   |                              | 10.90 (0.10)                     | 12.21 (0.07)                      | 12.34 (0.16)                      | 12.33 (0.26)                       | 11.49 (0.23)                        | 11.79 (0.12)                    | 11.95 (0.13)                    |               |
|                              | 50 <sup>th</sup> percentile |                                   |                              | 10.61 (0.15)                     | 12.23 (0.06)                      | 12.19 (0.11)                      | 12.35 (0.08)                       | 11.94 (0.13)                        | 12.01 (0.08)                    | 12.06 (0.12)                    |               |
|                              | 80 <sup>th</sup> percentile |                                   |                              | 10.91 (0.09)                     | 12.25 (0.06)                      | 12.27 (0.14)                      | 12.49 (0.09)                       | 12.13 (0.15)                        | 12.26 (0.10)                    | 12.47 (0.10)                    |               |
|                              | <i>Poverty level</i>        |                                   |                              |                                  |                                   |                                   |                                    |                                     |                                 |                                 |               |
|                              | at risk of poverty          |                                   |                              |                                  |                                   |                                   |                                    |                                     |                                 |                                 |               |

Poverty level

|                              |              |              |              |              |              |              |              |
|------------------------------|--------------|--------------|--------------|--------------|--------------|--------------|--------------|
| at risk of poverty           | 10.80 (0.12) | 12.22 (0.07) | 12.31 (0.15) | 12.36 (0.09) | 11.74 (0.19) | 11.82 (0.09) | 12.08 (0.14) |
| above 2x the risk of poverty | 10.69 (0.12) | 12.25 (0.06) | 12.31 (0.09) | 12.41 (0.07) | 12.09 (0.15) | 12.29 (0.08) | 12.47 (0.11) |

**Note:**

<sup>a</sup> Age categories defined as follows: 6-8 = age  $\geq 6$  and  $< 9$ ; 9-11 = age  $\geq 9$  and  $< 12$ ; 12-14 = age  $\geq 12$  and  $< 15$ ; 15-17 = age  $\geq 15$  and  $< 18$

<sup>b</sup> values based on observed data; the percent missing was low (typically below 2%), except for some surveys for age at menarche (range: 0.62 to 9.83%), as listed below.

<sup>c</sup> NA = no US-born black Americans were in this upper income stratum

| Health outcome  | Race/ethnicity               | Age (yr)                                   | NHES II<br>(1963-1965) | NHES III<br>(1966-1970) | NHANES I<br>(1971-1975) | NHANES II<br>(1976-1980) | NHANES III<br>(1988-1994) | NHANES<br>(1999-2004) | NHANES<br>(2005-2008) |
|-----------------|------------------------------|--------------------------------------------|------------------------|-------------------------|-------------------------|--------------------------|---------------------------|-----------------------|-----------------------|
| Height          | US-born black (non-Hispanic) | 6-8                                        | 0 (0)                  |                         | 0 (0)                   | 0 (0)                    | 3 (0.57)                  | 5 (0.93)              | 2 (0.64)              |
|                 | US-born white (non-Hispanic) | 6-8                                        | 0 (0)                  |                         | 0 (0)                   | 0 (0)                    | 1 (0.24)                  | 2 (0.46)              | 0 (0)                 |
| Age at menarche | US-born black (non-Hispanic) | Among all asked question (age 9 and older) |                        | 7 (1.59)                | 3 (1.42)                | 2 (1.49)                 | 40 (8.71)                 | 13 (5.60)             | 22 (9.09)             |
|                 | US-born white (non-Hispanic) | Among all asked question (age 9 and older) |                        | 38 (1.70)               | 6 (1.17)                | 3 (0.62)                 | 34 (9.83)                 | 6 (4.00)              | 14 (7.45)             |



**Figure S1. Risk of poverty and body build, cardiovascular, and child development outcomes for black and white non-Hispanic participants (adults 25-74; children 6-17), National Health and Examination Survey I (1959-1962) through National Health and Nutrition Examination Survey 2005-2008: on-average values for, and mean difference between, persons in households at risk of poverty and at twice the risk of poverty (adjusted for age and gender).**

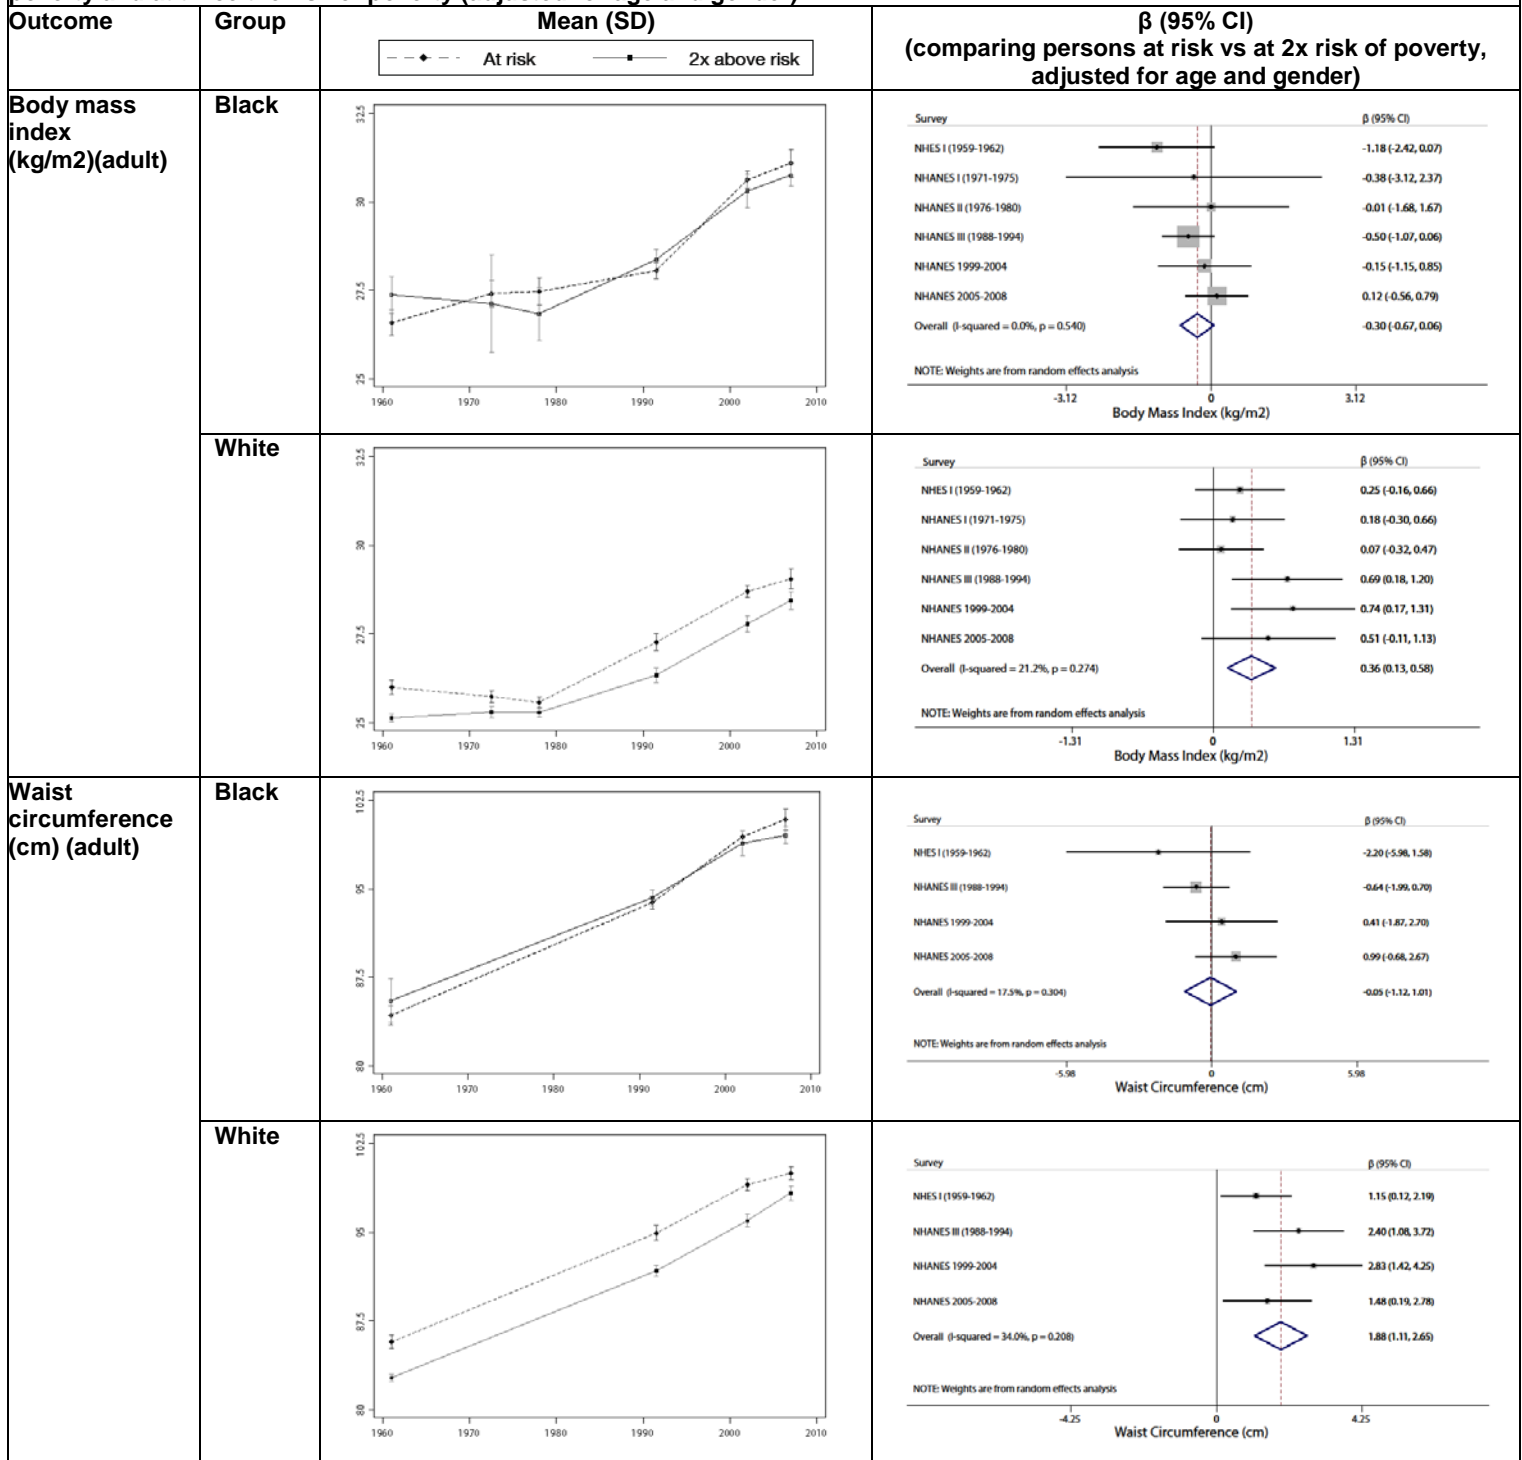

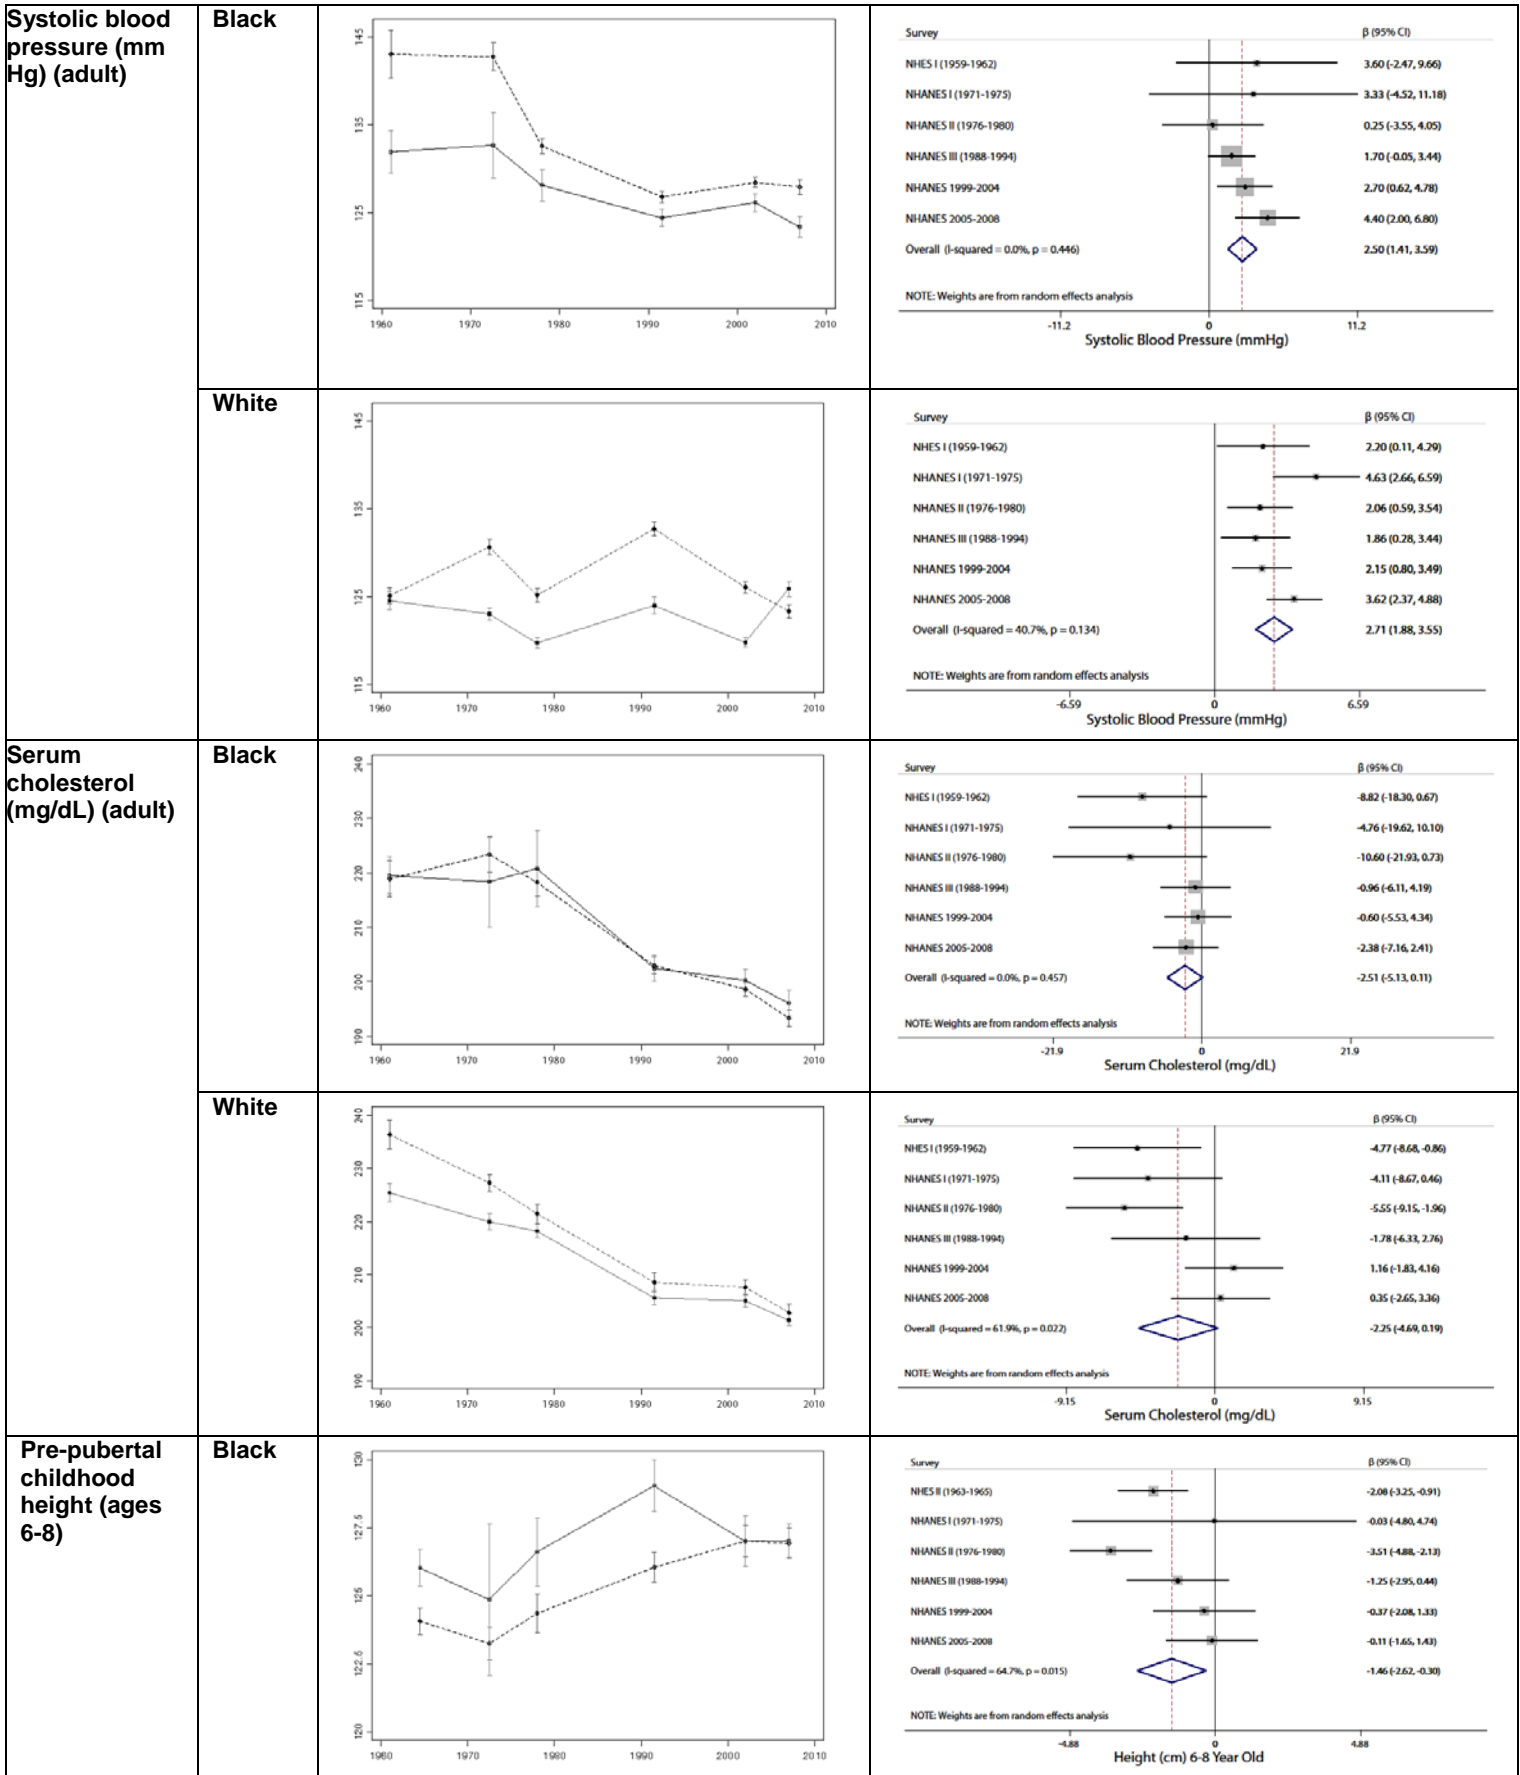

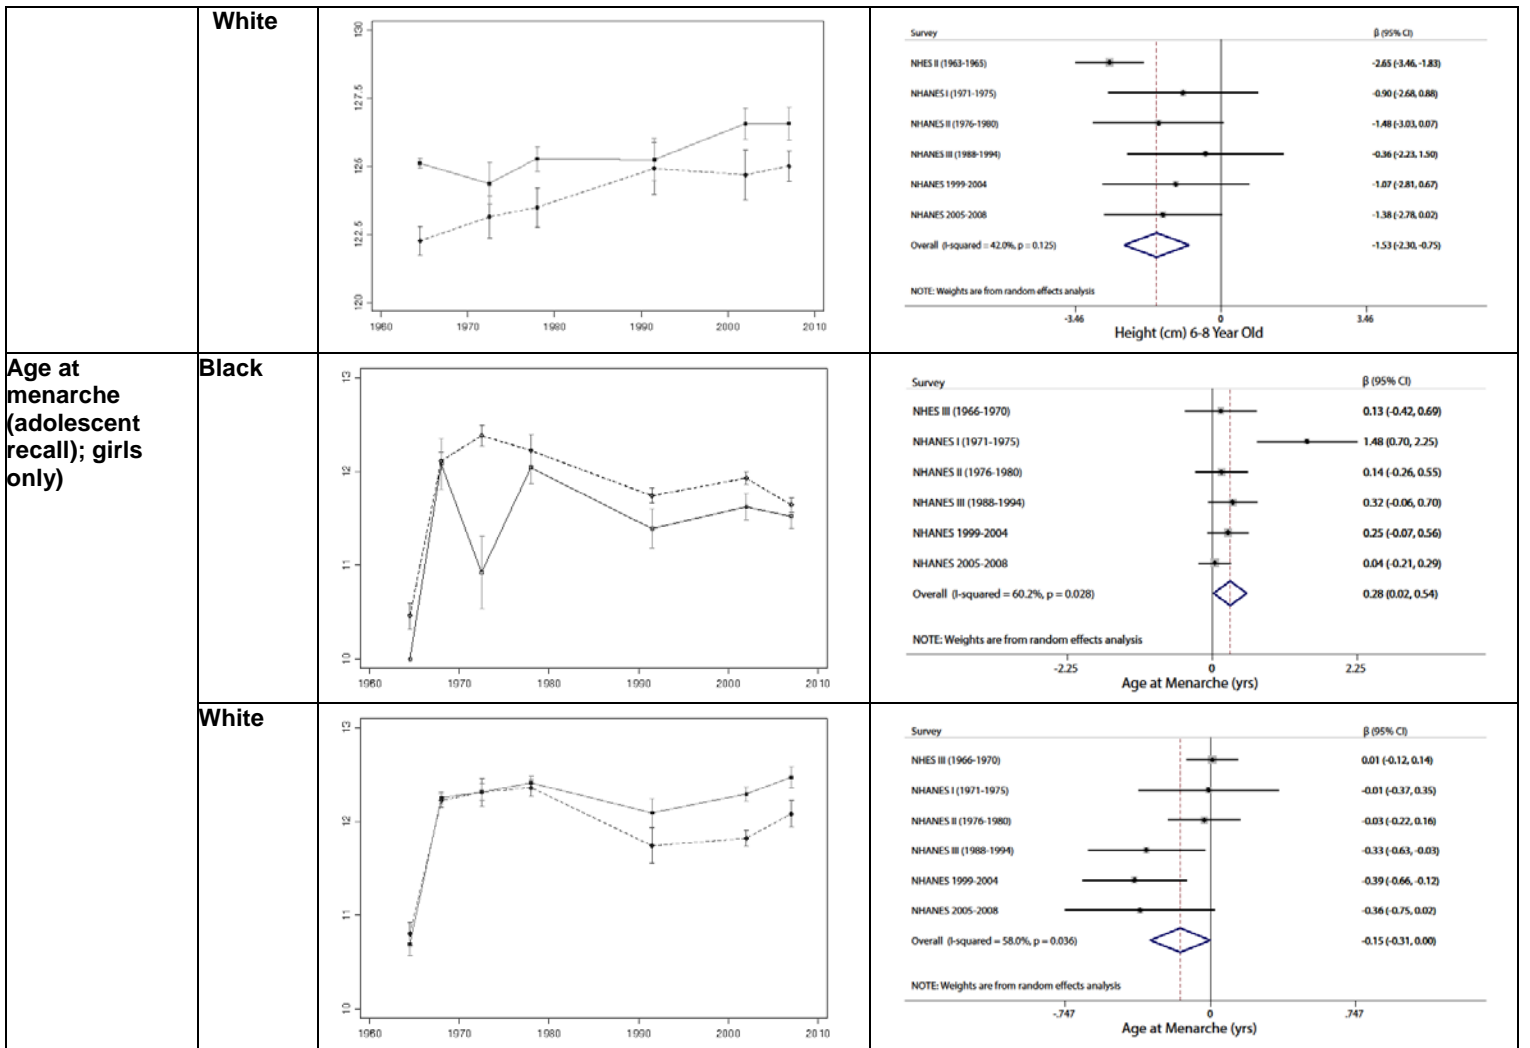

**Figure S2. Black vs white difference for body build, cardiovascular, and child development outcomes for black and white non-Hispanic participants (adults 25-74; children 6-17), National Health and Examination Survey I (1959-1962) through National Health and Nutrition Examination Survey 2005-2008: overall (adjusted for age and gender) and additionally adjusted for risk of poverty.**

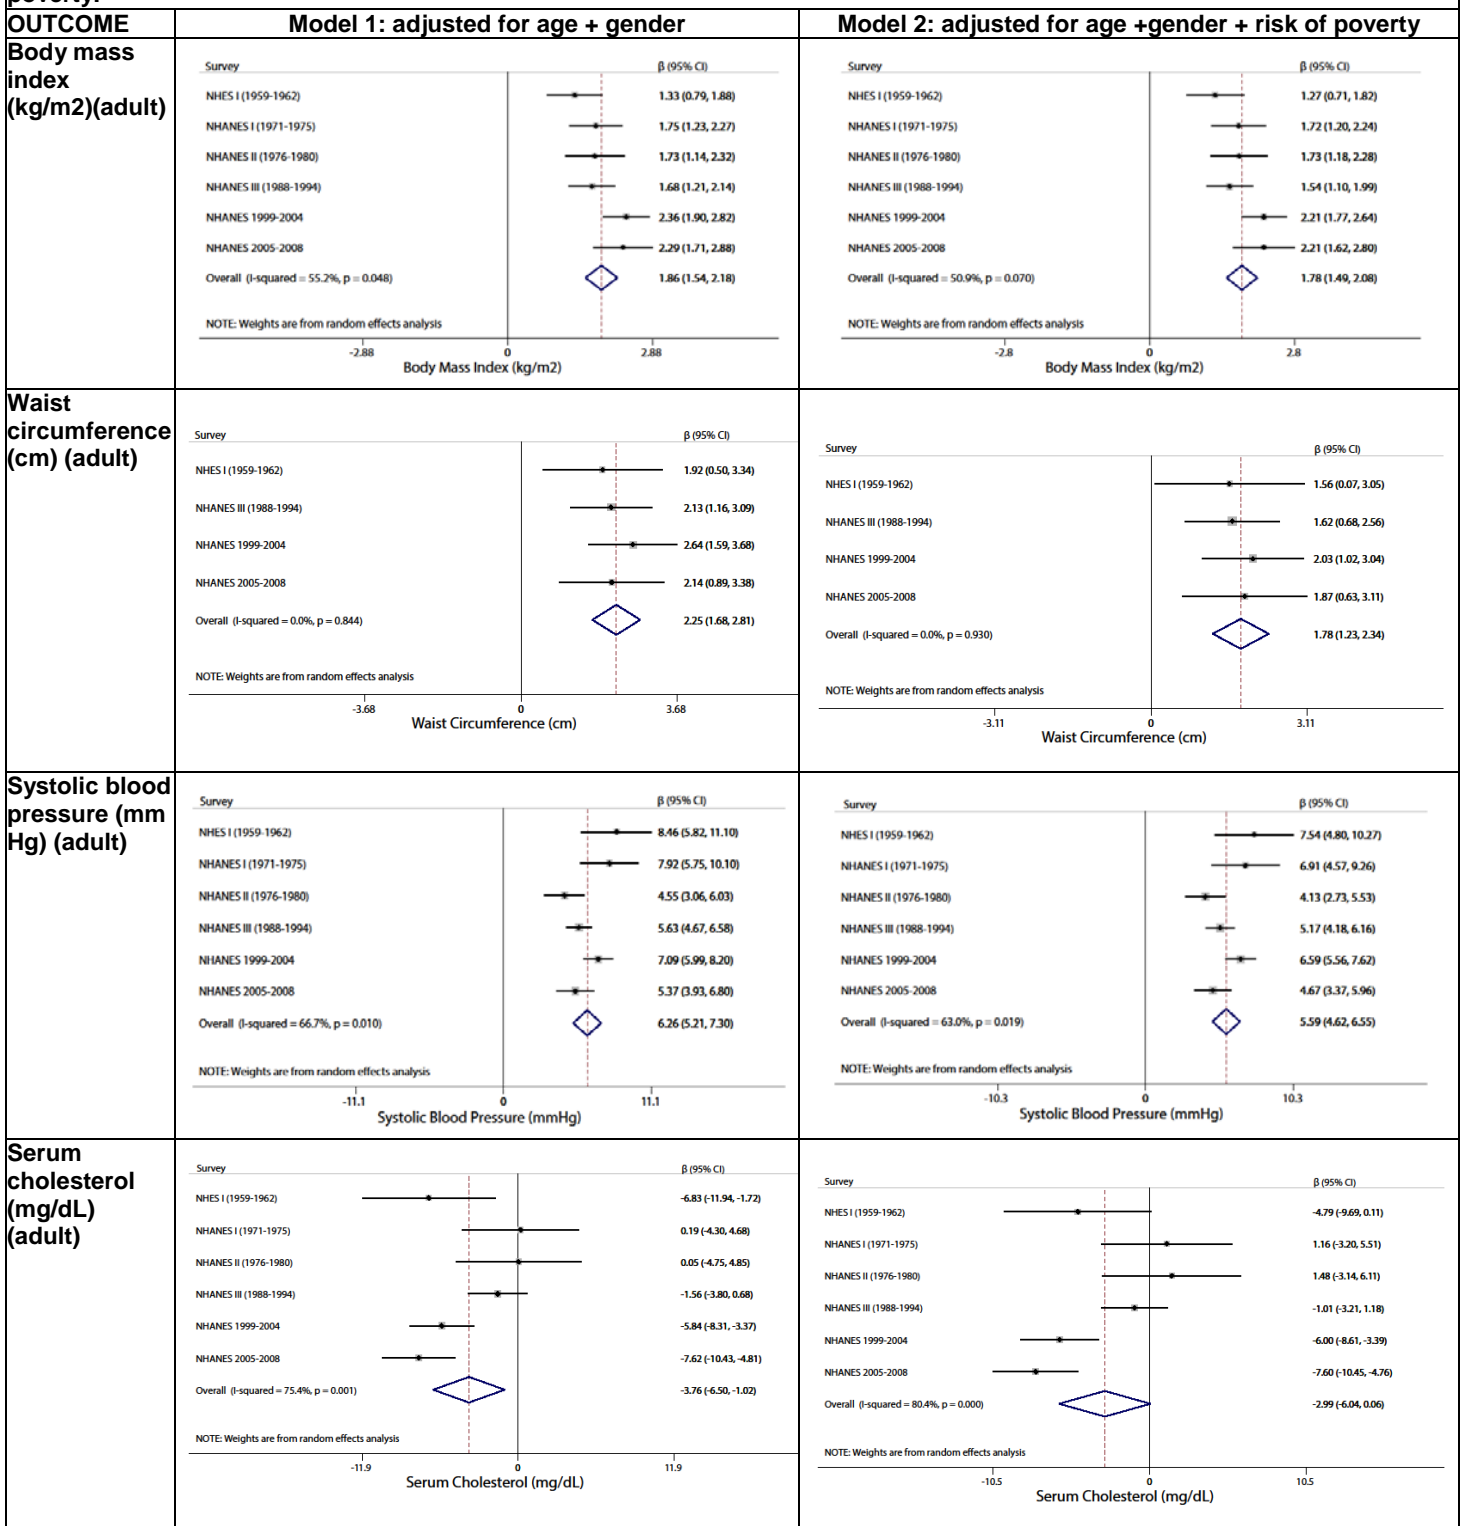

**Pre-pubertal childhood height (ages 6-8)**

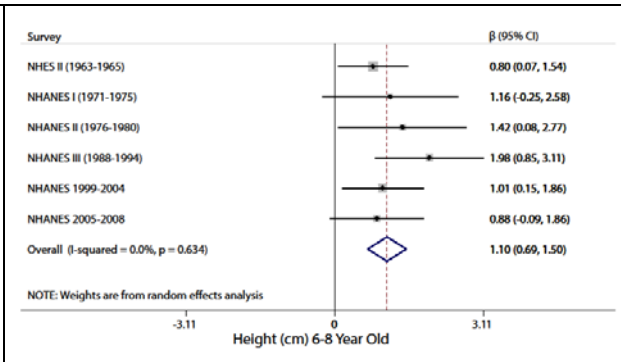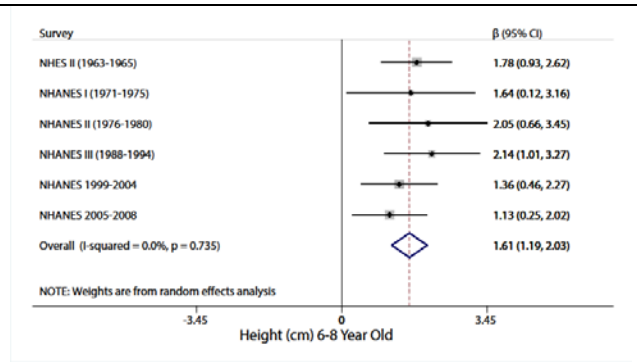

**Age at menarche (adolescent recall; girls only)\***

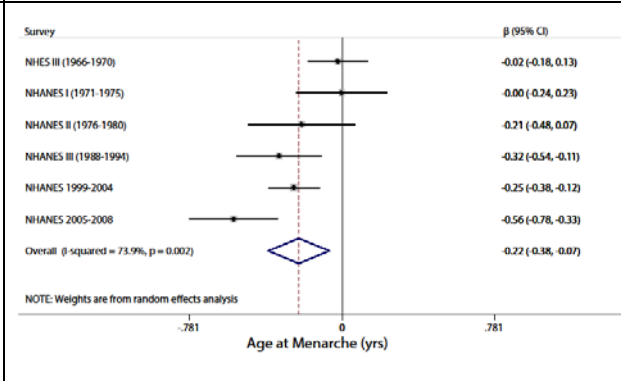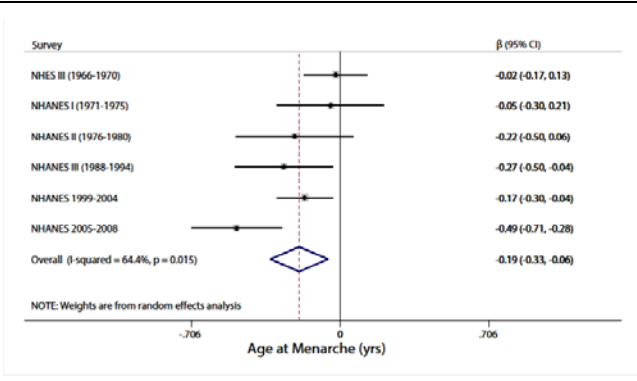

\* analyses for age at menarche not adjusted for gender (since girls only)
